# Supplementary material for: Lay provider HIV testing: A promising strategy to reach the undiagnosed key populations in Vietnam
Source: PubMed Central journal article supplement (PMC6312239; doi:10.1371/journal.pone.0210063), 2018-12-31
Supplement: pone.0210063.s003.pdf [file pone.0210063.s003.pdf]

## QUESTIONNAIRES ON HIV LAY TESTING (TRANSLATED)

1. Date of performing a test (DD/MM/YY):  /  /
2. Lay tester ID:
3. Client ID:
4. City/Province:
  1. Dien Bien    2. Nghe An    3. Ha Noi    4. Ho Chi Minh
5. District:.....
6. Observer ID: .....

### PART A: SCREENING

| No                         | Question                                                                                                                                 | Answer                                                        | Code | Note                                                                                   |
|----------------------------|------------------------------------------------------------------------------------------------------------------------------------------|---------------------------------------------------------------|------|----------------------------------------------------------------------------------------|
| A1                         | Have you ever been tested for HIV?                                                                                                       | Yes                                                           | 1    |                                                                                        |
|                            |                                                                                                                                          | No                                                            | 0    | 0 → B1                                                                                 |
| A2                         | Have you tested for HIV in the last 12 months?                                                                                           | Yes                                                           | 1    |                                                                                        |
|                            |                                                                                                                                          | No                                                            | 0    |                                                                                        |
| A3                         | Where was your most recent HIV test?                                                                                                     | HTC site                                                      | 1    |                                                                                        |
|                            |                                                                                                                                          | Public hospital/clinic                                        | 2    |                                                                                        |
|                            |                                                                                                                                          | Private hospital/clinic                                       | 3    |                                                                                        |
|                            |                                                                                                                                          | Rehab center (05 - 06)                                        | 4    |                                                                                        |
|                            |                                                                                                                                          | Test performed by village health worker/ community staff/ CBO | 5    | <b>Thank you and end the interview</b>                                                 |
|                            |                                                                                                                                          | Self-testing                                                  | 6    |                                                                                        |
|                            |                                                                                                                                          | Mobile testing                                                | 7    |                                                                                        |
|                            |                                                                                                                                          | Other (please specify)                                        | 88   |                                                                                        |
| Don't remember/ don't know | 99                                                                                                                                       |                                                               |      |                                                                                        |
| A4                         | Can you share with me the result of your most recent HIV test?<br><br><i>You can refuse to answer this question if you don't want to</i> | Positive                                                      | 1    | <b>Thank you and end the interview, introduce to counselor for referral to C&amp;T</b> |
|                            |                                                                                                                                          | Negative                                                      | 2    |                                                                                        |

|  |  |                          |    |  |
|--|--|--------------------------|----|--|
|  |  | Unidentified             | 3  |  |
|  |  | Don't know/ don't answer | 99 |  |

### PART B: DEMOGRAPHIC INFORMATION

| No | Question                                                                                | Answer                                                   | Code  | Note |
|----|-----------------------------------------------------------------------------------------|----------------------------------------------------------|-------|------|
| B1 | What is your self-identified sex?                                                       | Male                                                     | 1     |      |
|    |                                                                                         | Female                                                   | 2     |      |
|    |                                                                                         | Male to Female transgender                               | 3     |      |
|    |                                                                                         | Female to Male transgender                               | 4     |      |
| B2 | Which year were you born?<br><i>(Calendar year)</i>                                     | Year                                                     | _____ |      |
| B3 | What is your ethnicity?                                                                 | Kinh                                                     | 1     |      |
|    |                                                                                         | Thai                                                     | 2     |      |
|    |                                                                                         | KhoMu                                                    | 3     |      |
|    |                                                                                         | H'Mong                                                   | 4     |      |
|    |                                                                                         | Dao                                                      | 5     |      |
|    |                                                                                         | Hoa                                                      | 6     |      |
|    |                                                                                         | Khmer                                                    | 7     |      |
|    |                                                                                         | Other (please specify)                                   | 88    |      |
| B4 | What is your <b>highest level of education</b> ?                                        | Illiterate                                               | 1     |      |
|    |                                                                                         | Primary school (grades 1-5)                              | 2     |      |
|    |                                                                                         | Secondary school (grades 6-9)                            | 3     |      |
|    |                                                                                         | High School (grades 10-12)                               | 4     |      |
|    |                                                                                         | Junior college, college, university, post-graduation     | 5     |      |
| B5 | What is your main job?<br><i>(The job that takes most of time and generates income)</i> | Farming, fishery, forestry                               | 1     |      |
|    |                                                                                         | Worker in factory/construction                           | 2     |      |
|    |                                                                                         | White color employee in government sector/private sector | 3     |      |
|    |                                                                                         | Entertainment/tourism staff                              | 4     |      |
|    |                                                                                         | Selling things, doing small business, services           | 5     |      |

| No  | Question                                                                                                 | Answer                                                | Code | Note                                        |
|-----|----------------------------------------------------------------------------------------------------------|-------------------------------------------------------|------|---------------------------------------------|
|     |                                                                                                          | Student                                               | 6    |                                             |
|     |                                                                                                          | Sex Work                                              | 7    |                                             |
|     |                                                                                                          | Freelance                                             | 8    |                                             |
|     |                                                                                                          | Unemployed                                            | 9    |                                             |
|     |                                                                                                          | Other (please specify)<br>_____                       | 88   |                                             |
| B6  | What was your average income per month in the last year?<br><br><i>(including all sources of income)</i> | Amount _____                                          |      |                                             |
|     |                                                                                                          | No answer                                             | 99   |                                             |
| B7  | What is your current marital status?                                                                     | Single                                                | 1    |                                             |
|     |                                                                                                          | Married                                               | 2    |                                             |
|     |                                                                                                          | Living with partner but not married                   | 3    |                                             |
|     |                                                                                                          | Separated/divorced/widowed                            | 4    |                                             |
|     |                                                                                                          | Other (please specify)<br>_____                       | 88   |                                             |
| B8  | Have you ever had sex in exchange for money or other assets?                                             | Yes                                                   | 1    |                                             |
|     |                                                                                                          | Never                                                 | 0    |                                             |
|     |                                                                                                          | Do not answer                                         | 99   |                                             |
| B9  | Have you ever had anal sex with other men?                                                               | N/A (in case of FEMALE or FEMALE to MALE TRANSGENDER) | 2    |                                             |
|     |                                                                                                          | Yes                                                   | 1    | Only ask male or male to female transgender |
|     |                                                                                                          | Never                                                 | 0    |                                             |
|     |                                                                                                          | Do not answer                                         | 99   |                                             |
| B10 | Have you ever injected a substance (drug)?                                                               | Yes                                                   | 1    |                                             |
|     |                                                                                                          | Never                                                 | 0    |                                             |
|     |                                                                                                          | Do not answer                                         | 99   |                                             |

**PART C: PRE-TEST**

| No | Question                                                                                                                                         | Answer                                        | Code | Note              |
|----|--------------------------------------------------------------------------------------------------------------------------------------------------|-----------------------------------------------|------|-------------------|
| C1 | Have you ever heard of a HIV test performed by a non-health care worker such as a: village health worker, community staff, or CBO workers?       | Yes                                           | 1    | 0 → C3<br>99 → C3 |
|    |                                                                                                                                                  | No                                            | 0    |                   |
|    |                                                                                                                                                  | Don't remember                                | 99   |                   |
| C2 | If yes, where did you get that piece of information?<br><br><i>(Multiple choices)</i>                                                            | Community outreach workers                    | 1    |                   |
|    |                                                                                                                                                  | Health staff                                  | 2    |                   |
|    |                                                                                                                                                  | Friends                                       | 3    |                   |
|    |                                                                                                                                                  | Relatives                                     | 4    |                   |
|    |                                                                                                                                                  | Spouse/partners                               | 5    |                   |
|    |                                                                                                                                                  | Facebook                                      | 6    |                   |
|    |                                                                                                                                                  | Internet                                      | 7    |                   |
|    |                                                                                                                                                  | TV, radio                                     | 8    |                   |
|    |                                                                                                                                                  | Leaflets                                      | 9    |                   |
|    |                                                                                                                                                  | Billboards                                    | 10   |                   |
|    |                                                                                                                                                  | Meetings, communication sessions in community | 11   |                   |
|    |                                                                                                                                                  | Other (please specify)                        | 88   |                   |
| C3 | Why do you choose the test performed by a non-health care worker (village health worker/ community staff/ CBO)?<br><br><i>(Multiple choices)</i> | anonymous                                     | 1    |                   |
|    |                                                                                                                                                  | Ensuring confidentiality                      | 2    |                   |
|    |                                                                                                                                                  | Ensuring privacy                              | 3    |                   |
|    |                                                                                                                                                  | Simple procedures                             | 4    |                   |
|    |                                                                                                                                                  | Near and convenient for travelling            | 5    |                   |
|    |                                                                                                                                                  | Flexible time                                 | 6    |                   |
|    |                                                                                                                                                  | Knowing result quickly                        | 7    |                   |

| No | Question                                                                                                                                                                              | Answer                                                             | Code | Note |
|----|---------------------------------------------------------------------------------------------------------------------------------------------------------------------------------------|--------------------------------------------------------------------|------|------|
|    |                                                                                                                                                                                       | Reasonable price                                                   | 8    |      |
|    |                                                                                                                                                                                       | Free                                                               | 9    |      |
|    |                                                                                                                                                                                       | Receiving clear and detailed counseling                            | 10   |      |
|    |                                                                                                                                                                                       | Friendly and considerate staff                                     | 11   |      |
|    |                                                                                                                                                                                       | Accurate test                                                      | 12   |      |
|    |                                                                                                                                                                                       | Receiving instruction and support in referral to health facilities | 13   |      |
|    |                                                                                                                                                                                       | Introduced by community outreach workers                           | 14   |      |
|    |                                                                                                                                                                                       | Introduced by health staff                                         | 15   |      |
|    |                                                                                                                                                                                       | Other (please specify)                                             | 88   |      |
| C4 | <p>To help you decide to take this test, what information do you need the most?</p> <p><b><i>(Choose the 3 most important answers)</i></b></p> <p><b><i>Show the answers.</i></b></p> | Price of the test                                                  | 1    |      |
|    |                                                                                                                                                                                       | Accuracy of the test                                               | 2    |      |
|    |                                                                                                                                                                                       | Confidentiality of the test                                        | 3    |      |
|    |                                                                                                                                                                                       | Duration of the test and getting result                            | 4    |      |
|    |                                                                                                                                                                                       | Process of performing the test                                     | 5    |      |
|    |                                                                                                                                                                                       | The place to take the test, how it looks like                      | 6    |      |
|    |                                                                                                                                                                                       | Testing equipment/instruments                                      | 7    |      |
|    |                                                                                                                                                                                       | Who is the tester and their capacity                               | 8    |      |
|    |                                                                                                                                                                                       | Attitudes of the staff/testers                                     | 9    |      |
|    |                                                                                                                                                                                       | Quality of counseling/persuading skills of counselor               | 10   |      |
|    |                                                                                                                                                                                       | Connection to other services such as confirmative test, C&T        | 11   |      |
|    |                                                                                                                                                                                       | Other (please specify)                                             | 88   |      |
| C5 | Who/where do you want to receive these pieces of                                                                                                                                      | Community outreach worker                                          | 1    |      |
|    |                                                                                                                                                                                       | Health staff                                                       | 2    |      |

| No | Question     | Answer                                                 | Code | Note |
|----|--------------|--------------------------------------------------------|------|------|
|    | information? | Friends                                                | 3    |      |
|    |              | Relatives                                              | 4    |      |
|    |              | Spouse/partners                                        | 5    |      |
|    |              | Facebook                                               | 6    |      |
|    |              | Internet                                               | 7    |      |
|    |              | TV, radio                                              | 8    |      |
|    |              | Leaflets                                               | 9    |      |
|    |              | Billboards                                             | 10   |      |
|    |              | Meetings, communication sessions in community meetings | 11   |      |
|    |              | Other (please specify)                                 | 88   |      |

***AFTER PART C, LAY TESTER STARTS PRE-TEST COUNSELING AND PERFORM THE TEST***

**(Mark X in all appropriate columns)**

**PART D1. PRE-TEST OBSERVATION**

| #   | Activities                               | Yes | No | Meet the standard | Notes |
|-----|------------------------------------------|-----|----|-------------------|-------|
|     | <b>PREPARE MATERIALS</b>                 |     |    |                   |       |
| D1  | Test card Determine HIV 1/2              |     |    | NA                |       |
| D2  | Lancet                                   |     |    | NA                |       |
| D3  | Chase buffer                             |     |    | NA                |       |
| D4  | Capillary tube                           |     |    | NA                |       |
| D5  | Sterile gauze                            |     |    | NA                |       |
| D6  | Antiseptive wipes                        |     |    | NA                |       |
| D7  | Bandage                                  |     |    | NA                |       |
| D8  | Disposable gloves                        |     |    | NA                |       |
| D9  | Tray                                     |     |    | NA                |       |
| D10 | 3 seperate waste bags                    |     |    | NA                |       |
| D11 | Watch/clock (any type)                   |     |    | NA                |       |
|     | <b>PRE-TEST COUNSELING, EMPHASIZE:</b>   |     |    |                   |       |
| D12 | Taking a test is voluntary               |     |    | NA                |       |
| D13 | Related information is kept confidential |     |    | NA                |       |

| #   | Activities                                                                                                                                       | Yes | No | Meet the standard | Notes |
|-----|--------------------------------------------------------------------------------------------------------------------------------------------------|-----|----|-------------------|-------|
|     | and privacy is ensured                                                                                                                           |     |    |                   |       |
| D14 | Explain process of testing (prick finger, collect the blood with capillary tube, transfer the blood to the sample pad, wait and read the result) |     |    | NA                |       |
| D15 | Interprete the result : <i>This test is accurate, but it is only a screening test for triage, not confirmative test.</i>                         |     |    | NA                |       |
| D16 | Confirm if the client agrees to take the test ( <b>Meet the standard:</b> Obtain written or verbal consent)                                      |     |    |                   |       |

#### PART D2. OBSERVATION OF PERFORMING A TEST

| #                      | Activities                                                                                                                                                                 | Yes | No | Meet the standard | Notes                    |
|------------------------|----------------------------------------------------------------------------------------------------------------------------------------------------------------------------|-----|----|-------------------|--------------------------|
| <b>TAKING THE TEST</b> |                                                                                                                                                                            |     |    |                   |                          |
| D17                    | Write down client code on the sample pad<br><b>(Meet the standard:</b> the client code written on the sample strip is <u>the same</u> with the client code in the logbook) |     |    |                   | Client code has 4 digits |
| D18                    | Lay tester washing hands (with water or hand washing soap provided by the project)                                                                                         |     |    | NA                |                          |
| D19                    | Lay tester wearing gloves                                                                                                                                                  |     |    | NA                |                          |
| D20                    | Tear one strip and remove the cover of the test pad<br><b>(Meet the standard:</b> without touching finger(s) on the sample pad)                                            |     |    |                   |                          |
| D21                    | Massage the finger ( <i>middle or ring fingers</i> )                                                                                                                       |     |    | NA                |                          |

| #   | Activities                                                                                                                                               | Yes                                                                      | No | Meet the standard | Notes                                             |
|-----|----------------------------------------------------------------------------------------------------------------------------------------------------------|--------------------------------------------------------------------------|----|-------------------|---------------------------------------------------|
| D22 | Clean the finger of the client with an antiseptic wipe (middle finger or ring-finger)                                                                    |                                                                          |    | NA                |                                                   |
| D23 | Performing finger prick<br>(Circle the appropriate option)                                                                                               | 1. One time<br>2. Two times<br>3. Three times<br>4. Three times but fail |    |                   | <b>If circle 4.<br/>-&gt; end<br/>observation</b> |
| D24 | Wipe away the first drop of blood with a sterile gauze pad                                                                                               |                                                                          |    | NA                |                                                   |
| D25 | Collect the blood with a capillary tube<br>( <b>Meet the standard:</b> fill the tube with blood between the 2 marked lines without too many air bubbles) |                                                                          |    |                   |                                                   |
| D26 | Bandage to stop the bleeding                                                                                                                             |                                                                          |    | NA                |                                                   |
| D27 | Transfer the blood to the sample pad<br>( <b>Meet the standard:</b> ensure the sample is fully dispensed on the sample pad)                              |                                                                          |    |                   |                                                   |
| D28 | Apply one drop of chase buffer to the sample pad<br>( <b>Meet the standard:</b> The tip of the chase buffer does not touch the sample on the test strip) |                                                                          |    |                   |                                                   |
| D29 | Read the results timely?<br>( <b>Meet the standard:</b> Reading the results between 15-60 minutes, not reading the results after 60 mins)                |                                                                          |    |                   |                                                   |
| D30 | Read the results correctly?<br>( <b>Meet the standard:</b>                                                                                               |                                                                          |    |                   | Observer checks if lay                            |



| #   | Activities                                                                                                                                                                                                                                                                                                                    | Yes                                                                                                        | No | Meet the standard | Notes                                   |
|-----|-------------------------------------------------------------------------------------------------------------------------------------------------------------------------------------------------------------------------------------------------------------------------------------------------------------------------------|------------------------------------------------------------------------------------------------------------|----|-------------------|-----------------------------------------|
|     | <ul style="list-style-type: none"> <li>- <i>Non-reactive: 1 red bar appears in control window</i></li> <li>- <i>Reactive: 2 red bars appear in control window and patient window</i></li> <li>- <i>Invalid: there is no red bar in the control window of the strip or a red bar appears in the patient window)</i></li> </ul> |                                                                                                            |    |                   | tester reads result correctly or not    |
| D31 | Results of the test read by the observer                                                                                                                                                                                                                                                                                      | <ol style="list-style-type: none"> <li>1. Non-reactive</li> <li>2. Reactive</li> <li>3. Invalid</li> </ol> |    |                   | Observer circles the appropriate option |

### PART D3. POST-TEST OBSERVATION

| #                           | Activities                                                                                                                                                                                                                                      | Yes | No | Meet the standard | Notes |
|-----------------------------|-------------------------------------------------------------------------------------------------------------------------------------------------------------------------------------------------------------------------------------------------|-----|----|-------------------|-------|
| <b>POST-TEST COUNSELING</b> |                                                                                                                                                                                                                                                 |     |    |                   |       |
| D32                         | Reconfirm confidentiality of information related to the test and the client                                                                                                                                                                     |     |    | NA                |       |
| <b>NON-REACTIVE RESULT</b>  |                                                                                                                                                                                                                                                 |     |    |                   |       |
| D33                         | <p>Explain the non-reactive result:</p> <p><b>(Meet the standard: the result is non-reactive. This result confirms 3 months ago you were not infected with HIV. But, this result does not reflect your status within the past 3 months)</b></p> |     |    |                   |       |
| D34                         | Talk about HIV prevention measures (e.g. condom use, sterile needles & syringes, methadone maintenance treatment)                                                                                                                               |     |    | NA                |       |

|                        |                                                                                                                                                                                                                                                                                                                       |  |  |    |  |
|------------------------|-----------------------------------------------------------------------------------------------------------------------------------------------------------------------------------------------------------------------------------------------------------------------------------------------------------------------|--|--|----|--|
| D35                    | Make an arrangement for retaking the test<br><b>(Meet the standard:</b> retake a test after 3 months, if the client had exposed to risk behavior in the last 3 months or take a test periodically every 6 months for any KP)                                                                                          |  |  |    |  |
| <b>REACTIVE RESULT</b> |                                                                                                                                                                                                                                                                                                                       |  |  |    |  |
| D36                    | Explain the reactive result:<br><b>(Meet the standard:</b> <i>the result is reactive, which means you are likely to be infected with HIV. However, this is just a screening test, not confirmative. It is essential for you to take another test in health facility to confirm your status as early as possible).</i> |  |  |    |  |
| D37                    | Talk about the necessity of taking a confirmative test                                                                                                                                                                                                                                                                |  |  | NA |  |
| D38                    | Introduce client to a health facility to have confirmative test                                                                                                                                                                                                                                                       |  |  | NA |  |
| D39                    | Show empathy and willingness to support for the client to have a confirmative test<br><b>(Meet the standard:</b> Write and give a referral slip to the client, and make an appointment with the health facility for the client, and offer accompanying him/her to the health facility, if he/she agrees)              |  |  |    |  |
| <b>INVALID RESULT</b>  |                                                                                                                                                                                                                                                                                                                       |  |  |    |  |
| D40                    | Admit mistake and apologize client for inconvenience of retaking the test                                                                                                                                                                                                                                             |  |  | NA |  |
| D41                    | Ask for permission to retake the test                                                                                                                                                                                                                                                                                 |  |  | NA |  |

|                  |                                                                                                                                                                                         |  |  |    |  |
|------------------|-----------------------------------------------------------------------------------------------------------------------------------------------------------------------------------------|--|--|----|--|
| D42              | Encourage client to take their partners to take a test                                                                                                                                  |  |  | NA |  |
| <b>FINISH UP</b> |                                                                                                                                                                                         |  |  |    |  |
| D43              | Collect rubbish and medical waste for disposal according to regulations<br><b>(Meet the standard:</b> contain in 3 separate waste bags/ dustbins: 1. Sample pad; 2. Lancet; 3. Rubbish) |  |  |    |  |
| D44              | Wash hands                                                                                                                                                                              |  |  | NA |  |
| D45              | Note down client's information in the logbook                                                                                                                                           |  |  | NA |  |

**Note:** Mark X in both “Yes” and “Meet standard” columns, if relevant in rows with “Meet standard:...”

**PART E: POST-TEST PROCEDURE  
(INTERVIEW CLIENT INDIVIDUALLY)**

| #  | Question                                                                  | Answer                                                     | Code | Notes                      |
|----|---------------------------------------------------------------------------|------------------------------------------------------------|------|----------------------------|
| E1 | In general, are you satisfied with the testing service you have received? | Very satisfied                                             | 1    | 3 → E4<br>4 → E3<br>5 → E3 |
|    |                                                                           | Satisfied                                                  | 2    |                            |
|    |                                                                           | Neutral                                                    | 3    |                            |
|    |                                                                           | Unsatisfied                                                | 4    |                            |
|    |                                                                           | Very unsatisfied                                           | 5    |                            |
| E2 | If yes, what are you satisfied with?<br><b>(Multiple choices)</b>         | Appropriate place for testing (convenient/ clean/ private) | 1    | After E2 → move to E4      |
|    |                                                                           | Flexible time, short waiting time, quick result            | 2    |                            |

| #  | Question                                                           | Answer                                                                              | Code | Notes |
|----|--------------------------------------------------------------------|-------------------------------------------------------------------------------------|------|-------|
|    |                                                                    | Friendly and considerate staff                                                      | 3    |       |
|    |                                                                    | Staff has good skills of performing a test                                          | 4    |       |
|    |                                                                    | Simple and painless sample taking (finger prick, oral swab)                         | 5    |       |
|    |                                                                    | Easy to understand and detailed counseling                                          | 6    |       |
|    |                                                                    | Ensuring confidentiality of the test                                                | 7    |       |
|    |                                                                    | Free                                                                                | 8    |       |
|    |                                                                    | Reasonable price                                                                    | 9    |       |
|    |                                                                    | Receiving instruction and referral to other services such as confirmative test, C&T | 10   |       |
|    |                                                                    | Other (Please specify)<br>_____                                                     | 88   |       |
| E3 | If NO, what are you unsatisfied with?<br><b>(Multiple choices)</b> | Inapropriate place for testing (far/unclean/ not private)                           | 1    |       |
|    |                                                                    | Inappropriate schedule for the test, long waiting time                              | 2    |       |
|    |                                                                    | Staffhas inapropriate attitude (unfriendly)                                         | 3    |       |
|    |                                                                    | skills of the staff to take the test are not good                                   | 4    |       |
|    |                                                                    | Counseling is done in a unthorough and hasty manner                                 | 5    |       |

| #  | Question                                                                                                                                                                                                 | Answer                                                       | Code | Notes |
|----|----------------------------------------------------------------------------------------------------------------------------------------------------------------------------------------------------------|--------------------------------------------------------------|------|-------|
|    |                                                                                                                                                                                                          | Confidentiality and privacy are not ensured                  | 6    |       |
|    |                                                                                                                                                                                                          | The test is costly                                           | 7    |       |
|    |                                                                                                                                                                                                          | No referral to other services such as confirmative test, C&T | 8    |       |
|    |                                                                                                                                                                                                          | Unclear testing result                                       | 9    |       |
|    |                                                                                                                                                                                                          | Other (please specify)                                       | 88   |       |
| E4 | <p><b>Where</b> do you want a village health staff/ community staff/ CBO to perform HIV lay testing <b>the most</b>?</p> <p><i>Show or read out loud the answers</i></p> <p><b>Choose one answer</b></p> | At your house                                                | 1    |       |
|    |                                                                                                                                                                                                          | At your workplace                                            | 2    |       |
|    |                                                                                                                                                                                                          | At lay tester's house                                        | 3    |       |
|    |                                                                                                                                                                                                          | At lay tester's workplace (e.g. CBO office)                  | 4    |       |
|    |                                                                                                                                                                                                          | At commune health station                                    | 5    |       |
|    |                                                                                                                                                                                                          | In a private place, not the above-mentioned places           | 6    |       |
|    |                                                                                                                                                                                                          | Wherever, I don't care                                       | 7    |       |
|    |                                                                                                                                                                                                          | Other (please specify)<br>_____                              | 88   |       |
| E5 | If you continue taking an HIV test in the community, who do you want <b>the most</b> to perform the test for you?                                                                                        | Community staff/ CBO                                         | 1    |       |
|    |                                                                                                                                                                                                          | Village health worker                                        | 2    |       |
|    |                                                                                                                                                                                                          | Commune health station staff                                 | 3    |       |
|    |                                                                                                                                                                                                          | District health staff doing HIV mobile testing               | 4    |       |

| #  | Question                                                                                                                                                                                                                                                               | Answer                                                                                    | Code | Notes |
|----|------------------------------------------------------------------------------------------------------------------------------------------------------------------------------------------------------------------------------------------------------------------------|-------------------------------------------------------------------------------------------|------|-------|
|    | <p><i>Show or read out loud the answers</i></p> <p><b>Choose one answer</b></p>                                                                                                                                                                                        | Self-test                                                                                 | 5    |       |
|    |                                                                                                                                                                                                                                                                        | Other (please specify)                                                                    | 88   |       |
|    |                                                                                                                                                                                                                                                                        | Won't do it again/ Don't know/<br>Don't answer                                            | 99   |       |
| E6 | <p>If you continue taking an HIV test, what <b>form of sample taking</b> do you <b>like the most?</b></p> <p>(explain the difference between the three options and show a picture)</p> <p><i>Show or read out loud the answers</i></p> <p><b>Choose one answer</b></p> | Oral swab                                                                                 | 1    |       |
|    |                                                                                                                                                                                                                                                                        | Finger prick                                                                              | 2    |       |
|    |                                                                                                                                                                                                                                                                        | Venipuncture                                                                              | 3    |       |
|    |                                                                                                                                                                                                                                                                        | Any form is OK                                                                            | 4    |       |
|    |                                                                                                                                                                                                                                                                        | Won't do it again/ Don't know/<br>Don't answer                                            | 99   |       |
| E7 | <p>If you had the option for a HIV self-test (explain what it means), would you rather test yourself instead of being tested by someone else?</p>                                                                                                                      | Yes                                                                                       | 1    |       |
|    |                                                                                                                                                                                                                                                                        | No                                                                                        | 2    |       |
|    |                                                                                                                                                                                                                                                                        | No preference                                                                             | 3    |       |
|    |                                                                                                                                                                                                                                                                        | Don't know/don't answer                                                                   | 99   |       |
| E8 | <p>Now that you have tested for HIV in the community, can you tell us if you prefer:</p> <p><i>Show or read out loud the answers</i></p> <p>(choose one answer)</p>                                                                                                    | Testing in the community as you did today                                                 | 1    |       |
|    |                                                                                                                                                                                                                                                                        | Testing in a fixed HIV testing site such as a VCT center of other public HIV testing site | 2    |       |
|    |                                                                                                                                                                                                                                                                        | Testing in a private clinic or hospital                                                   | 3    |       |

| #   | Question                                                                                                                                              | Answer                  | Code | Notes   |
|-----|-------------------------------------------------------------------------------------------------------------------------------------------------------|-------------------------|------|---------|
|     |                                                                                                                                                       | No preference           | 4    |         |
|     |                                                                                                                                                       | Don't know/don't answer | 99   |         |
| E9  | Do you want to <b>introduce</b> the testing service that you have today to other people (for example your spouse/partner, friends or family members?) | Yes                     | 1    |         |
|     |                                                                                                                                                       | No                      | 0    |         |
|     |                                                                                                                                                       | Don't know/Don't answer | 99   |         |
| E10 | Are you willing to pay 60,000VND for one HIV test like the one that you have taken today?                                                             | Yes                     | 1    |         |
|     |                                                                                                                                                       | No                      | 0    | 0 → E13 |
| E11 | Are you willing to pay 90,000VND for one HIV test like the one that you have taken today?                                                             | Yes                     | 1    |         |
|     |                                                                                                                                                       | No                      | 0    | 0 → E14 |
| E12 | Are you willing to pay 120,000VND for one HIV test like the one that you have taken today?                                                            | Yes                     | 1    | 1 → E14 |
|     |                                                                                                                                                       | No                      | 0    | 0 → E14 |
| E13 | Are you willing to pay 30,000VND for one HIV test like the one that you have taken today?                                                             | Yes                     | 1    |         |
|     |                                                                                                                                                       | No                      | 0    |         |
| E14 | What is the maximum price are you willing to pay for one HIV test like the one that you have taken today                                              | Amount: _____           |      |         |
| E15 | How frequently do you plan to test for HIV in the coming                                                                                              | Less than once a year   | 1    |         |
|     |                                                                                                                                                       | Once a year             | 2    |         |

| # | Question                                       | Answer                                                   | Code | Notes |
|---|------------------------------------------------|----------------------------------------------------------|------|-------|
|   | time?<br><br>Show or read out loud the answers | Twice a year                                             | 3    |       |
|   |                                                | Three times a year                                       | 4    |       |
|   |                                                | Four or more times a year                                | 5    |       |
|   |                                                | Won't have HIV test anymore/<br>Don't know/ Don't answer | 99   |       |

**THANK YOU!**
