# Supplementary material for: Lay provider HIV testing: A promising strategy to reach the undiagnosed key populations in Vietnam
Source: PubMed Central journal article supplement (PMC6312239; doi:10.1371/journal.pone.0210063), 2018-12-31
Supplement: pone.0210063.s004.pdf [file pone.0210063.s004.pdf]

## BỘ CÂU HỎI VỀ TƯ VẤN XÉT NGHIỆM HIV KHÔNG CHUYÊN

1. Ngày xét nghiệm (Ngày/ tháng/ năm):  /  /
2. Mã số của xét nghiệm viên không chuyên:
3. Mã số của khách hàng:
4. Tỉnh/ thành phố:
  1. Điện Biên
  2. Nghệ An
  3. Hà Nội
  4. Hồ Chí Minh
5. Quận/ Huyện thực hiện quan sát : .....
6. Mã số giám sát viên: .....

### PHẦN A: SÀNG LỌC

| STT | Câu hỏi                                                                                                              | Trả lời                                                                      | Mã số | Ghi chú                                                                                               |
|-----|----------------------------------------------------------------------------------------------------------------------|------------------------------------------------------------------------------|-------|-------------------------------------------------------------------------------------------------------|
| A1  | Anh/ chị đã từng làm xét nghiệm HIV chưa?                                                                            | Đã từng                                                                      | 1     |                                                                                                       |
|     |                                                                                                                      | Chưa từng làm xét nghiệm                                                     | 0     | 0→ Câu B1                                                                                             |
| A2  | Trong 12 tháng qua, anh/ chị có xét nghiệm HIV không?                                                                | Có                                                                           | 1     |                                                                                                       |
|     |                                                                                                                      | Không                                                                        | 0     |                                                                                                       |
| A3  | Lần xét nghiệm gần đây nhất, anh/ chị đã làm xét nghiệm ở đâu?                                                       | Cơ sở tư vấn và xét nghiệm HIV                                               | 1     |                                                                                                       |
|     |                                                                                                                      | Bệnh viện/ phòng khám nhà nước                                               | 2     |                                                                                                       |
|     |                                                                                                                      | Bệnh viện/ phòng khám tư nhân                                                | 3     |                                                                                                       |
|     |                                                                                                                      | Trung tâm giáo dục lao động xã hội (05-06)                                   | 4     |                                                                                                       |
|     |                                                                                                                      | Xét nghiệm do nhân viên y tế thôn bản hoặc nhân viên cộng đồng/nhân viên CBO | 5     | <b>Cảm ơn và <b>dừng cuộc phỏng vấn</b></b>                                                           |
|     |                                                                                                                      | Tự xét nghiệm                                                                | 6     |                                                                                                       |
|     |                                                                                                                      | Xét nghiệm lưu động                                                          | 7     |                                                                                                       |
|     |                                                                                                                      | Khác _____                                                                   | 88    |                                                                                                       |
|     |                                                                                                                      | Không nhớ/ Không biết                                                        | 99    |                                                                                                       |
| A4  | Xin phép anh/ chị có thể chia sẻ với cá nhân tôi về kết quả của xét nghiệm lần gần đây nhất của bản thân mình không? | Dương tính                                                                   | 1     | <b>Cảm ơn và <b>dừng cuộc phỏng vấn</b></b> , giới thiệu tư vấn viên để chuyển gửi chăm sóc, điều trị |
|     |                                                                                                                      | Âm tính                                                                      | 2     |                                                                                                       |

|  |                                                                                 |                          |    |  |
|--|---------------------------------------------------------------------------------|--------------------------|----|--|
|  | <i>Anh/ chị có quyền từ chối trả lời câu hỏi này nếu như không muốn trả lời</i> | Không xác định           | 3  |  |
|  |                                                                                 | Không biết/Không trả lời | 99 |  |

### PHẦN B: THÔNG TIN NHÂN KHẨU

| STT | Câu hỏi                                                                                                                                      | Trả lời                                   | Mã số | Ghi chú |
|-----|----------------------------------------------------------------------------------------------------------------------------------------------|-------------------------------------------|-------|---------|
| B1  | Giới tính tự nhận của anh/chị là gì?                                                                                                         | Nam                                       | 1     |         |
|     |                                                                                                                                              | Nữ                                        | 2     |         |
|     |                                                                                                                                              | Chuyển giới nam sang nữ                   | 3     |         |
|     |                                                                                                                                              | Chuyển giới nữ sang nam                   | 4     |         |
| B2  | Anh/ chị sinh năm nào?<br>(Năm dương lịch)                                                                                                   | Năm _____                                 |       |         |
| B3  | Anh/ chị là người dân tộc gì?                                                                                                                | Kinh                                      | 1     |         |
|     |                                                                                                                                              | Thái                                      | 2     |         |
|     |                                                                                                                                              | Khơ Mú                                    | 3     |         |
|     |                                                                                                                                              | Mông                                      | 4     |         |
|     |                                                                                                                                              | Dao                                       | 5     |         |
|     |                                                                                                                                              | Hoa                                       | 6     |         |
|     |                                                                                                                                              | Khơ Me                                    | 7     |         |
|     |                                                                                                                                              | Khác (ghi rõ) _____                       | 88    |         |
| B4  | Xin anh/chị cho biết trình độ <b>học vấn cao nhất</b> của anh/chị?                                                                           | Mù chữ                                    | 1     |         |
|     |                                                                                                                                              | Tiểu học (1-5)                            | 2     |         |
|     |                                                                                                                                              | Cấp II (6-9)                              | 3     |         |
|     |                                                                                                                                              | Cấp III (10-12)                           | 4     |         |
|     |                                                                                                                                              | Trung cấp, cao đẳng, đại học, sau đại học | 5     |         |
| B5  | Anh/ chị đang làm nghề gì là chính?<br><br>( <i>nghề nghiệp chính là nghề chiếm nhiều thời gian nhất và đem lại nguồn thu cho bản thân</i> ) | Nông dân, ngư dân, lâm nghiệp             | 1     |         |
|     |                                                                                                                                              | Công nhân xây dựng/công nhân nhà - máy    | 2     |         |
|     |                                                                                                                                              | Cán bộ văn phòng/chuyên môn               | 3     |         |
|     |                                                                                                                                              | Nhân viên dịch vụ giải trí/du lịch        | 4     |         |
|     |                                                                                                                                              | Doanh nhân/Kinh doanh/Buôn bán            | 5     |         |
|     |                                                                                                                                              | Sinh viên                                 | 6     |         |
|     |                                                                                                                                              | Bán dâm                                   | 7     |         |
|     |                                                                                                                                              | Lao động tự do/dịch vụ tự do              | 8     |         |

| STT | Câu hỏi                                                                                                            | Trả lời                                                          | Mã số | Ghi chú                                                    |
|-----|--------------------------------------------------------------------------------------------------------------------|------------------------------------------------------------------|-------|------------------------------------------------------------|
|     |                                                                                                                    | Thất nghiệp                                                      | 9     |                                                            |
|     |                                                                                                                    | Khác (nêu cụ thể)_____                                           | 88    |                                                            |
| B6  | Trong năm vừa qua, thu nhập trung bình hàng tháng của anh/ chị là bao nhiêu?<br><br>(Bao gồm tất cả các nguồn thu) | Số tiền _____                                                    |       |                                                            |
|     |                                                                                                                    | Không trả lời                                                    | 99    |                                                            |
| B7  | Tình trạng hôn nhân hiện nay của anh/ chị là gì?                                                                   | Độc thân (chưa lập gia đình)                                     | 1     |                                                            |
|     |                                                                                                                    | Đã kết hôn                                                       | 2     |                                                            |
|     |                                                                                                                    | Đang sống chung với bạn tình nhưng không kết hôn                 | 3     |                                                            |
|     |                                                                                                                    | Ly thân/ ly dị/ góa                                              | 4     |                                                            |
|     |                                                                                                                    | Khác (ghi rõ)_____                                               | 88    |                                                            |
| B8  | Anh/chị đã bao giờ quan hệ tình dục để đổi lấy tiền hoặc các tài sản khác chưa?                                    | Có                                                               | 1     |                                                            |
|     |                                                                                                                    | Chưa bao giờ                                                     | 0     |                                                            |
|     |                                                                                                                    | Không trả lời                                                    | 99    |                                                            |
| B9  | Anh đã bao giờ có quan hệ tình dục đường hậu môn với một người nam giới khác chưa?                                 | Không phù hợp (Do khách hàng là NỮ hoặc CHUYỂN GIỚI NỮ SANG NAM) | 2     |                                                            |
|     |                                                                                                                    | Có                                                               | 1     | Chỉ hỏi cho nam giới hoặc người chuyển giới từ nam sang nữ |
|     |                                                                                                                    | Chưa bao giờ                                                     | 0     |                                                            |
|     |                                                                                                                    | Không trả lời                                                    | 99    |                                                            |
| B10 | Anh/chị đã từng tiêm chích một chất gây nghiện (ma túy) nào không?                                                 | Có                                                               | 1     |                                                            |
|     |                                                                                                                    | Không                                                            | 0     |                                                            |
|     |                                                                                                                    | Không trả lời                                                    | 99    |                                                            |

**PHẦN C: CÂU HỎI TRƯỚC XÉT NGHIỆM**

| STT           | Câu hỏi                                                                                                                                                                                 | Trả lời                                     | Mã số | Ghi chú     |
|---------------|-----------------------------------------------------------------------------------------------------------------------------------------------------------------------------------------|---------------------------------------------|-------|-------------|
| C1            | Trước đây, anh/chị <b>đã từng nghe nói</b> về xét nghiệm HIV do người không phải là cán bộ y tế thực hiện chưa, ví dụ như nhân viên cộng đồng/nhân viên CBO hoặc y tế thôn bản ?        | Có                                          | 1     | 0 → Câu C3  |
|               |                                                                                                                                                                                         | Không                                       | 0     |             |
|               |                                                                                                                                                                                         | Không nhớ                                   | 99    | 99 → Câu C3 |
| C2            | Nếu có, anh/chị biết được thông tin đó từ nguồn nào/từ ai?<br><b>(Câu hỏi nhiều lựa chọn)</b>                                                                                           | Tiếp cận viên cộng đồng                     | 1     |             |
|               |                                                                                                                                                                                         | Nhân viên y tế                              | 2     |             |
|               |                                                                                                                                                                                         | Bạn bè                                      | 3     |             |
|               |                                                                                                                                                                                         | Họ hàng                                     | 4     |             |
|               |                                                                                                                                                                                         | Vợ/chồng/bạn tình                           | 5     |             |
|               |                                                                                                                                                                                         | Facebook                                    | 6     |             |
|               |                                                                                                                                                                                         | Internet                                    | 7     |             |
|               |                                                                                                                                                                                         | TiVi, đài                                   | 8     |             |
|               |                                                                                                                                                                                         | Tờ rơi                                      | 9     |             |
|               |                                                                                                                                                                                         | Pano, Áp phích, bảng thông tin              | 10    |             |
|               |                                                                                                                                                                                         | Cuộc họp, buổi truyền thông cộng đồng       | 11    |             |
| Khác (ghi rõ) | 88                                                                                                                                                                                      |                                             |       |             |
| C3            | Vì lý do gì mà Anh/chị lựa chọn làm xét nghiệm do người không phải là cán bộ y tế thực hiện (nhân viên cộng đồng/nhân viên CBO hoặc y tế thôn bản )?<br><b>(Câu hỏi nhiều lựa chọn)</b> | Không lộ danh tính                          | 1     |             |
|               |                                                                                                                                                                                         | Đảm bảo bí mật                              | 2     |             |
|               |                                                                                                                                                                                         | Đảm bảo riêng tư                            | 3     |             |
|               |                                                                                                                                                                                         | Thủ tục đơn giản                            | 4     |             |
|               |                                                                                                                                                                                         | Địa điểm gần, đi lại thuận tiện             | 5     |             |
|               |                                                                                                                                                                                         | Thời gian linh hoạt,                        | 6     |             |
|               |                                                                                                                                                                                         | Biết kết quả nhanh                          | 7     |             |
|               |                                                                                                                                                                                         | Giá phải chăng                              | 8     |             |
|               |                                                                                                                                                                                         | Miễn phí                                    | 9     |             |
|               |                                                                                                                                                                                         | Được tư vấn cụ thể, rõ ràng                 | 10    |             |
|               |                                                                                                                                                                                         | Nhân viên thân thiện, chu đáo               | 11    |             |
|               |                                                                                                                                                                                         | Xét nghiệm chính xác                        | 12    |             |
|               |                                                                                                                                                                                         | Được chỉ dẫn, hỗ trợ kết nối với cơ sở y tế | 13    |             |

| STT | Câu hỏi                                                                                                                                               | Trả lời                                                                                 | Mã số | Ghi chú |
|-----|-------------------------------------------------------------------------------------------------------------------------------------------------------|-----------------------------------------------------------------------------------------|-------|---------|
|     |                                                                                                                                                       | Được tiếp cận viên cộng đồng giới thiệu                                                 | 14    |         |
|     |                                                                                                                                                       | Được nhân viên y tế giới thiệu                                                          | 15    |         |
|     |                                                                                                                                                       | Khác (cụ thể)_____                                                                      | 88    |         |
| C4  | <p>Để anh/chị quyết định làm xét nghiệm này anh/chị cần biết những thông tin gì nhất?</p> <p>(chọn 3 ý quan trọng nhất) – Cho xem đáp án để chọn.</p> | Giá thành của xét nghiệm                                                                | 1     |         |
|     |                                                                                                                                                       | Độ chính xác của xét nghiệm                                                             | 2     |         |
|     |                                                                                                                                                       | Tính bảo mật của xét nghiệm                                                             | 3     |         |
|     |                                                                                                                                                       | Thời gian làm xét nghiệm và trả kết quả                                                 | 4     |         |
|     |                                                                                                                                                       | Qui trình làm xét nghiệm                                                                | 5     |         |
|     |                                                                                                                                                       | Nơi thực hiện xét nghiệm ở đâu/ như thế nào                                             | 6     |         |
|     |                                                                                                                                                       | Trang thiết bị, dụng cụ xét nghiệm                                                      | 7     |         |
|     |                                                                                                                                                       | Nhân viên xét nghiệm là ai/trình độ thế nào                                             | 8     |         |
|     |                                                                                                                                                       | Thái độ phục vụ, đón tiếp                                                               | 9     |         |
|     |                                                                                                                                                       | Chất lượng tư vấn/khả năng thuyết phục của nhân viên tư vấn                             | 10    |         |
|     |                                                                                                                                                       | Có thể kết nối với các dịch vụ khác như xét nghiệm khẳng định, chăm sóc và điều trị HIV | 11    |         |
|     |                                                                                                                                                       | Khác (ghi rõ)_____                                                                      | 88    |         |
| C5  | <p>Anh/chị muốn nhận các thông tin nêu trên từ ai/từ nguồn nào nhất?</p> <p>(chọn 3 ý quan trọng nhất) – Cho xem đáp án để chọn.</p>                  | Tiếp cận viên cộng đồng                                                                 | 1     |         |
|     |                                                                                                                                                       | Nhân viên y tế                                                                          | 2     |         |
|     |                                                                                                                                                       | Bạn bè                                                                                  | 3     |         |
|     |                                                                                                                                                       | Họ hàng                                                                                 | 4     |         |
|     |                                                                                                                                                       | Vợ/chồng/bạn tình                                                                       | 5     |         |
|     |                                                                                                                                                       | Facebook                                                                                | 6     |         |
|     |                                                                                                                                                       | Internet                                                                                | 7     |         |
|     |                                                                                                                                                       | TiVi, đài                                                                               | 8     |         |
|     |                                                                                                                                                       | Tờ rơi                                                                                  | 9     |         |
|     |                                                                                                                                                       | Pano, Áp phích, bảng thông tin                                                          | 10    |         |
|     |                                                                                                                                                       | Cuộc họp, buổi truyền thông cộng đồng                                                   | 11    |         |
|     |                                                                                                                                                       | Khác (ghi rõ)_____                                                                      | 88    |         |

**SAU KHI KẾT THÚC PHẦN C, NHÂN VIÊN XÉT NGHIỆM KHÔNG CHUYÊN SẼ BẮT ĐẦU QUI TRÌNH TƯ VẤN TRƯỚC XÉT NGHIỆM và LÀM XÉT NGHIỆM**

**QUAN SÁT VIÊN TIẾN HÀNH QUY TRÌNH QUAN SÁT**

(Đánh dấu X vào cột phù hợp)

**PHẦN D1. QUAN SÁT TRƯỚC XÉT NGHIỆM**

| STT                                                     | Nội dung                                                                                                                                                             | Không | Có | Đạt chuẩn     | Ghi chú |
|---------------------------------------------------------|----------------------------------------------------------------------------------------------------------------------------------------------------------------------|-------|----|---------------|---------|
| <b>CHUẨN BỊ DỤNG CỤ</b>                                 |                                                                                                                                                                      |       |    |               |         |
| D1                                                      | Que xét nghiệm Determine HIV 1/2                                                                                                                                     |       |    | Không<br>điền |         |
| D2                                                      | Kim chích máu                                                                                                                                                        |       |    | Không<br>điền |         |
| D3                                                      | Dung dịch đệm                                                                                                                                                        |       |    | Không<br>điền |         |
| D4                                                      | Ống mao dẫn                                                                                                                                                          |       |    | Không<br>điền |         |
| D5                                                      | Miếng bông sát khuẩn                                                                                                                                                 |       |    | Không<br>điền |         |
| D6                                                      | Miếng bông khô                                                                                                                                                       |       |    | Không<br>điền |         |
| D7                                                      | Băng dính cá nhân                                                                                                                                                    |       |    | Không<br>điền |         |
| D8                                                      | Găng tay                                                                                                                                                             |       |    | Không<br>điền |         |
| D9                                                      | Khay đựng dụng cụ                                                                                                                                                    |       |    | Không<br>điền |         |
| D10                                                     | 3 túi đựng rác riêng biệt                                                                                                                                            |       |    | Không<br>điền |         |
| D11                                                     | Đồng hồ đếm giờ (bất cứ đồng hồ nào)                                                                                                                                 |       |    | Không<br>điền |         |
| <b>TƯ VẤN TRƯỚC XÉT NGHIỆM HIV, TRONG ĐÓ NHẤN MẠNH:</b> |                                                                                                                                                                      |       |    |               |         |
| D12                                                     | Xét nghiệm là hoàn toàn tự nguyện                                                                                                                                    |       |    | Không<br>điền |         |
| D13                                                     | Mọi thông tin liên quan đều được giữ bí mật, riêng tư.                                                                                                               |       |    | Không<br>điền |         |
| D14                                                     | Giải thích quy trình xét nghiệm (chích máu đầu ngón tay, lấy máu vào ống mao dẫn, nhỏ máu vào que thử, chờ và đọc kết quả)                                           |       |    | Không<br>điền |         |
| D15                                                     | Giải thích ý nghĩa của kết quả xét nghiệm :<br><i>Xét nghiệm này là chính xác nhưng chỉ là xét nghiệm sàng lọc để phân loại ban đầu, chưa có ý nghĩa khẳng định.</i> |       |    | Không<br>điền |         |
| D16                                                     | Khẳng định khách hàng đồng ý tham gia xét nghiệm ( <b>Đạt chuẩn:</b> khách hàng ký phiếu tham gia xét nghiệm hoặc thỏa thuận                                         |       |    |               |         |

| STT | Nội dung | Không | Có | Đạt chuẩn | Ghi chú |
|-----|----------|-------|----|-----------|---------|
|     | miệng)   |       |    |           |         |

## PHẦN D2. QUAN SÁT THỰC HIỆN XÉT NGHIỆM

| STT                         | Nội dung                                                                                                                                    | Có | Không | Đạt chuẩn                                                                   | Ghi chú                                            |
|-----------------------------|---------------------------------------------------------------------------------------------------------------------------------------------|----|-------|-----------------------------------------------------------------------------|----------------------------------------------------|
| <b>THỰC HIỆN XÉT NGHIỆM</b> |                                                                                                                                             |    |       |                                                                             |                                                    |
| D17                         | Ghi mã số khách hàng lên que thử<br><b>(Đạt chuẩn:</b> mã khách hàng ghi trên que thử trùng với mã khách hàng trong sổ của xét nghiệm viên) |    |       |                                                                             | Mã KH có 4 kí tự số                                |
| D18                         | Người làm xét nghiệm rửa tay (với nước thường hoặc nước rửa tay dự án cung cấp)                                                             |    |       | Không<br>điền                                                               |                                                    |
| D19                         | Người làm xét nghiệm đi găng tay                                                                                                            |    |       | Không<br>điền                                                               |                                                    |
| D20                         | Xé vỏ que thử<br><b>(Đạt chuẩn:</b> Không chạm tay vào vùng nhỏ mẫu của que thử)                                                            |    |       |                                                                             |                                                    |
| D21                         | Xoa nhẹ ngón tay từ gốc đến đốt 2 ( <i>ngón giữa hoặc áp út</i> )                                                                           |    |       | Không<br>điền                                                               |                                                    |
| D22                         | Sát khuẩn đầu ngón tay bằng miếng sát khuẩn                                                                                                 |    |       | Không<br>điền                                                               |                                                    |
| D23                         | Chích máu đầu ngón tay<br>(khoanh tròn vào số tương ứng)                                                                                    |    |       | 1. Một lần<br>2. Hai lần<br>3. Ba lần<br>4. Ba lần nhưng không lấy được máu | <b>Nếu chọn “đáp án 4” -&gt; kết thúc quan sát</b> |
| D24                         | Dùng miếng bông vô khuẩn lau bỏ giọt máu đầu                                                                                                |    |       | Không<br>điền                                                               |                                                    |

| STT | Nội dung                                                                                                                                                                                                                                                                                             | Có | Không                                                         | Đạt chuẩn     | Ghi chú                                       |
|-----|------------------------------------------------------------------------------------------------------------------------------------------------------------------------------------------------------------------------------------------------------------------------------------------------------|----|---------------------------------------------------------------|---------------|-----------------------------------------------|
| D25 | Dùng ống mao dẫn lấy máu xét nghiệm<br><b>(Đạt chuẩn:</b> lấy máu đến giữa hai vạch đen của ống mao dẫn và không có quá nhiều bọt khí)                                                                                                                                                               |    |                                                               |               |                                               |
| D26 | Cầm máu đầu ngón tay                                                                                                                                                                                                                                                                                 |    |                                                               | Không<br>điền |                                               |
| D27 | Đưa mẫu máu vào vùng nhỏ mẫu của que thử<br><b>(Đạt chuẩn:</b> Đảm bảo máu thấm hết vào vùng nhỏ mẫu của que thử)                                                                                                                                                                                    |    |                                                               |               |                                               |
| D28 | Nhỏ dung dịch đệm vào vùng nhỏ mẫu<br><b>(Đạt chuẩn:</b> Không chạm đầu lọ dung dịch vào mẫu xét nghiệm trên que thử)                                                                                                                                                                                |    |                                                               |               |                                               |
| D29 | Đọc kết quả đúng thời gian quy định?<br><b>(Đạt chuẩn:</b> trong khoảng 15 – 60 phút, không đọc kết quả sau 60 phút.)                                                                                                                                                                                |    |                                                               |               |                                               |
| D30 | Đọc đúng kết quả xét nghiệm?<br><b>(Đạt chuẩn:</b><br>- Không phản ứng: Que thử xuất hiện 1 vạch đỏ (ô vạch chứng)<br>- Có phản ứng: que thử xuất hiện 2 vạch đỏ (ô vạch chứng và ô kết quả)<br>- Không đủ tiêu chuẩn: không xuất hiện vạch màu nào hay chỉ xuất hiện vạch bên dưới (vạch ô kết quả) |    |                                                               |               | Giám sát viên kiểm tra xem đọc có đúng không? |
| D31 | Quan sát viên đọc kết quả của xét nghiệm này là:                                                                                                                                                                                                                                                     |    | 1. Không phản ứng<br>2. Có phản ứng<br>3. Không đủ tiêu chuẩn |               | Giám sát viên khoanh vào số tương ứng         |

### PHẦN D3. QUAN SÁT SAU XÉT NGHIỆM

| STT                          | Nội dung                                                                      | Có | Không | Đạt chuẩn | Ghi chú |
|------------------------------|-------------------------------------------------------------------------------|----|-------|-----------|---------|
| <b>TƯ VẤN SAU XÉT NGHIỆM</b> |                                                                               |    |       |           |         |
| D32                          | Khẳng định lại sự bảo mật về thông tin liên quan đến xét nghiệm và khách hàng |    |       | Không     |         |



|                                    |                                                                                                                                                                                                                                                                                             |  |  |               |  |
|------------------------------------|---------------------------------------------------------------------------------------------------------------------------------------------------------------------------------------------------------------------------------------------------------------------------------------------|--|--|---------------|--|
|                                    |                                                                                                                                                                                                                                                                                             |  |  | điền          |  |
| <b>KẾT QUẢ KHÔNG PHẢN ỨNG</b>      |                                                                                                                                                                                                                                                                                             |  |  |               |  |
| D33                                | Giải thích ý nghĩa kết quả không phản ứng:<br><b>(Đạt chuẩn: kết quả của bạn là không phản ứng, kết quả này khẳng định từ 3 tháng trở về trước, bạn chưa nhiễm HIV. Kết quả này không phản ánh tình trạng nhiễm HIV của bạn trong 3 tháng gần đây.)</b>                                     |  |  |               |  |
| D34                                | Trao đổi về các biện pháp dự phòng HIV (ví dụ sử dụng bao cao su, bơm kim tiêm sạch, điều trị methadone).                                                                                                                                                                                   |  |  | Không<br>điền |  |
| D35                                | Hẹn lịch xét nghiệm lại<br><b>(Đạt chuẩn: xét nghiệm lại sau 3 tháng (nếu khách hàng có hành vi nguy cơ/phơi nhiễm trong 3 tháng qua) hoặc định kỳ 6 tháng 1 lần đối với các nhóm có nguy cơ cao.)</b>                                                                                      |  |  |               |  |
| <b>KẾT QUẢ CÓ PHẢN ỨNG</b>         |                                                                                                                                                                                                                                                                                             |  |  |               |  |
| D36                                | Giải thích ý nghĩa kết quả có phản ứng<br><b>(Đạt chuẩn: kết quả của bạn là có phản ứng. Tuy nhiên, đây chỉ mới là xét nghiệm phân loại ban đầu, chưa thể khẳng định chắc chắn. Việc cần làm là bạn nhanh chóng đến cơ sở y tế làm thêm xét nghiệm để khẳng định tình trạng nhiễm HIV.)</b> |  |  |               |  |
| D37                                | Trao đổi về việc cần thiết làm xét nghiệm chẩn đoán                                                                                                                                                                                                                                         |  |  | Không<br>điền |  |
| D38                                | Giới thiệu khách hàng đến CSYT để lấy máu                                                                                                                                                                                                                                                   |  |  | Không<br>điền |  |
| D39                                | Thể hiện sự đồng cảm và sẵn sàng hỗ trợ khách hàng đi làm xét nghiệm khẳng định<br><b>(Đạt chuẩn: viết phiếu chuyển gửi cho khách hàng, thu xếp lịch hẹn với cơ sở y tế cho khách hàng, và đề xuất đi cùng khách hàng đến cơ sở y tế nếu họ đồng ý.)</b>                                    |  |  |               |  |
| <b>KẾT QUẢ KHÔNG ĐỦ TIÊU CHUẨN</b> |                                                                                                                                                                                                                                                                                             |  |  |               |  |
| D40                                | Giải thích lý do và xin lỗi khách hàng về sự bất tiện khi phải thực hiện lại xét nghiệm                                                                                                                                                                                                     |  |  | Không<br>điền |  |
| D41                                | Xin phép thực hiện lại                                                                                                                                                                                                                                                                      |  |  | Không<br>điền |  |
| D42                                | Khuyến khích khách hàng đưa bạn tình đi xét nghiệm                                                                                                                                                                                                                                          |  |  | Không<br>điền |  |
| <b>HOÀN THIỆN</b>                  |                                                                                                                                                                                                                                                                                             |  |  |               |  |
| D43                                | Thu dọn rác thải vào túi rác thải y tế mang về trạm y tế để xử lý theo quy định                                                                                                                                                                                                             |  |  |               |  |

|     |                                                                                                                             |  |  |               |  |
|-----|-----------------------------------------------------------------------------------------------------------------------------|--|--|---------------|--|
|     | <b>(Đạt chuẩn:</b> rác thải được bỏ vào 3 túi nilon riêng biệt/3 thùng rác riêng biệt: 1. Que thử; 2. Kim chích máu; 3.Rác) |  |  |               |  |
| D44 | Rửa tay                                                                                                                     |  |  | Không<br>điền |  |
| D45 | Ghi chép thông tin khách hàng vào sổ                                                                                        |  |  | Không<br>điền |  |

**Lưu ý:** Đánh dấu X vào cả 2 cột “Có” và “**Đạt chuẩn**” nếu câu nào phù hợp với “**Đạt chuẩn:...**”

**PHẦN E: CÂU HỎI SAU XÉT NGHIỆM  
(PHỎNG VẤN RIÊNG KHÁCH HÀNG)**

| STT | Câu hỏi                                                                                                                | Trả lời                                                                                        | Mã số | Ghi chú                                                     |
|-----|------------------------------------------------------------------------------------------------------------------------|------------------------------------------------------------------------------------------------|-------|-------------------------------------------------------------|
| E1  | Nhìn chung, anh/ chị có <b>hài lòng</b> với dịch vụ xét nghiệm mà anh/chị vừa nhận không?<br>(Cho xem hoặc đọc đáp án) | Rất hài lòng                                                                                   | 1     | <b>3</b> → Câu E4<br><b>4</b> → Câu E3<br><b>5</b> → Câu E3 |
|     |                                                                                                                        | Hài lòng                                                                                       | 2     |                                                             |
|     |                                                                                                                        | Bình thường                                                                                    | 3     |                                                             |
|     |                                                                                                                        | Không hài lòng                                                                                 | 4     |                                                             |
|     |                                                                                                                        | Rất không hài lòng                                                                             | 5     |                                                             |
| E2  | Nếu hài lòng, anh/chị thấy hài lòng về những điều gì?<br><b>(Chọn nhiều đáp án)</b>                                    | Địa điểm xét nghiệm phù hợp (thuận tiện/sạch sẽ/kín đáo)                                       | 1     | <b>Kết thúc E2 sẽ chuyển sang E4</b>                        |
|     |                                                                                                                        | Thời gian linh hoạt, ít chờ đợi, kết quả nhanh                                                 | 2     |                                                             |
|     |                                                                                                                        | Thái độ nhân viên thân thiện, chu đáo                                                          | 3     |                                                             |
|     |                                                                                                                        | Kỹ năng làm xét nghiệm của nhân viên tốt                                                       | 4     |                                                             |
|     |                                                                                                                        | Cách lấy mẫu xét nghiệm đơn giản, không đau (chích đầu ngón tay/lấy nước bọt)                  | 5     |                                                             |
|     |                                                                                                                        | Tư vấn đầy đủ, dễ hiểu                                                                         | 6     |                                                             |
|     |                                                                                                                        | Đảm bảo bí mật của xét nghiệm                                                                  | 7     |                                                             |
|     |                                                                                                                        | Miễn phí                                                                                       | 8     |                                                             |
|     |                                                                                                                        | Giá cả hợp lý                                                                                  | 9     |                                                             |
|     |                                                                                                                        | Được chỉ dẫn, kết nối với các dịch vụ khác như xét nghiệm khẳng định, chăm sóc và điều trị HIV | 10    |                                                             |

| STT | Câu hỏi                                                                                                                                                                                 | Trả lời                                                                                   | Mã số | Ghi chú |
|-----|-----------------------------------------------------------------------------------------------------------------------------------------------------------------------------------------|-------------------------------------------------------------------------------------------|-------|---------|
|     |                                                                                                                                                                                         | Khác (ghi rõ)_____                                                                        | 88    |         |
| E3  | <p>Nếu KHÔNG hài lòng, anh/chị thấy KHÔNG hài lòng về những điều gì?</p> <p><i>(Chọn nhiều đáp án)</i></p>                                                                              | Địa điểm xét nghiệm không phù hợp (đi xa/không sạch sẽ/không kín đáo)                     | 1     |         |
|     |                                                                                                                                                                                         | Lịch làm xét nghiệm không phù hợp, chờ đợi lâu                                            | 2     |         |
|     |                                                                                                                                                                                         | Thái độ nhân viên không phù hợp (thiếu cởi mở, thân thiện)                                | 3     |         |
|     |                                                                                                                                                                                         | Kỹ năng làm xét nghiệm chưa đảm bảo                                                       | 4     |         |
|     |                                                                                                                                                                                         | Tư vấn vội vàng, chưa đầy đủ                                                              | 5     |         |
|     |                                                                                                                                                                                         | Tính bảo mật và riêng tư chưa tốt                                                         | 6     |         |
|     |                                                                                                                                                                                         | Chi phí tốn kém khi làm xét nghiệm                                                        | 7     |         |
|     |                                                                                                                                                                                         | Chưa kết nối với các dịch vụ khác như như xét nghiệm khẳng định, chăm sóc và điều trị HIV | 8     |         |
|     |                                                                                                                                                                                         | Kết quả xét nghiệm không rõ ràng                                                          | 9     |         |
|     |                                                                                                                                                                                         | Khác (ghi rõ)_____                                                                        | 88    |         |
| E4  | <p>Anh/ chị muốn được nhân viên cộng đồng/nhân viên CBO hoặc y tế thôn bản thực hiện xét nghiệm HIV ở đâu nhất?</p> <p><i>Cho xem hoặc đọc đáp án</i></p> <p><i>Chọn một đáp án</i></p> | Tại nhà của anh/chị                                                                       | 1     |         |
|     |                                                                                                                                                                                         | Tại nơi làm việc của anh/chị                                                              | 2     |         |
|     |                                                                                                                                                                                         | Tại nhà của nhân viên xét nghiệm                                                          | 3     |         |
|     |                                                                                                                                                                                         | Tại nơi làm việc của nhân viên xét nghiệm (ví dụ văn phòng CBO)                           | 4     |         |
|     |                                                                                                                                                                                         | Tại trạm y tế xã phường                                                                   | 5     |         |
|     |                                                                                                                                                                                         | Ở một nơi kín đáo, không thuộc các địa điểm nêu trên                                      | 6     |         |
|     |                                                                                                                                                                                         | Không quan tâm, ở đâu cũng được                                                           | 7     |         |
|     |                                                                                                                                                                                         | Khác (ghi rõ) _____                                                                       | 88    |         |
| E5  | <p>Nếu tiếp tục làm xét nghiệm HIV tại cộng đồng, anh/chị thích ai làm xét nghiệm cho anh/chị nhất?</p>                                                                                 | Nhân viên cộng đồng/nhân viên CBO                                                         | 1     |         |
|     |                                                                                                                                                                                         | Y tế thôn bản                                                                             | 2     |         |

| STT                    | Câu hỏi                                                                                                                                                                                                   | Trả lời                                                                             | Mã số                                                    | Ghi chú |    |
|------------------------|-----------------------------------------------------------------------------------------------------------------------------------------------------------------------------------------------------------|-------------------------------------------------------------------------------------|----------------------------------------------------------|---------|----|
|                        | <i>Cho xem hoặc đọc đáp án</i>                                                                                                                                                                            | Cán bộ Y tế xã                                                                      | 3                                                        |         |    |
|                        | <b>Chọn một đáp án</b>                                                                                                                                                                                    | Cán bộ y tế y tế huyện làm xét nghiệm lưu động                                      | 4                                                        |         |    |
|                        |                                                                                                                                                                                                           | Tôi sẽ tự làm xét nghiệm                                                            | 5                                                        |         |    |
|                        |                                                                                                                                                                                                           | Khác (ghi rõ).....                                                                  | 88                                                       |         |    |
|                        |                                                                                                                                                                                                           | Sẽ không làm xét nghiệm nữa/Không biết/không trả lời                                | 99                                                       |         |    |
| E6                     | Nếu tiếp tục làm xét nghiệm HIV, <b>hình thức lấy mẫu</b> xét nghiệm nào sau đây anh/ chị <b>thích nhất?</b>                                                                                              | Lấy mẫu nước bọt bằng tăm bông                                                      | 1                                                        |         |    |
|                        | <i>Cho xem hoặc đọc đáp án</i>                                                                                                                                                                            | Chích máu đầu ngón tay                                                              | 2                                                        |         |    |
|                        |                                                                                                                                                                                                           | Lấy máu tĩnh mạch                                                                   | 3                                                        |         |    |
|                        |                                                                                                                                                                                                           | Hình thức nào cũng được                                                             | 4                                                        |         |    |
|                        |                                                                                                                                                                                                           | (Giải thích sự khác nhau giữa 3 hình thức và cho xem tranh ảnh)                     | Sẽ không làm xét nghiệm HIV nữa/Không biết/không trả lời |         | 99 |
| <i>Chọn một đáp án</i> |                                                                                                                                                                                                           |                                                                                     |                                                          |         |    |
| E7                     | Nếu anh/ chị được hướng dẫn cách tự làm xét nghiệm HIV cho mình (tự lấy máu đầu ngón tay hoặc lấy nước bọt bằng tăm bông, tự nhỏ dung dịch lên que thử và tự đọc kết quả), anh/ chị có muốn tự làm không? | Có                                                                                  | 1                                                        |         |    |
|                        |                                                                                                                                                                                                           | Không                                                                               | 2                                                        |         |    |
|                        |                                                                                                                                                                                                           | Thế nào cũng được                                                                   | 3                                                        |         |    |
|                        |                                                                                                                                                                                                           | Không biết/ không trả lời                                                           | 4                                                        |         |    |
| E8                     | Hôm nay Anh/ chị đã được làm xét nghiệm HIV tại cộng đồng, vậy anh/ chị thích làm xét nghiệm HIV ở đâu nhất trong các phương án sau?                                                                      | Xét nghiệm ở cộng đồng giống buổi hôm nay                                           | 1                                                        |         |    |
|                        |                                                                                                                                                                                                           | Xét nghiệm ở một nơi cố định, ví dụ như trung tâm xét nghiệm và tư vấn của nhà nước | 2                                                        |         |    |
|                        |                                                                                                                                                                                                           | <i>Cho xem hoặc đọc đáp án</i>                                                      | Xét nghiệm ở phòng khám hay bệnh viện tư nhân            |         | 3  |
|                        |                                                                                                                                                                                                           | <b>(Chọn một đáp án)</b>                                                            | Chỗ nào cũng được                                        |         | 4  |

| STT | Câu hỏi                                                                                                                                                                           | Trả lời                                                   | Mã số | Ghi chú       |
|-----|-----------------------------------------------------------------------------------------------------------------------------------------------------------------------------------|-----------------------------------------------------------|-------|---------------|
|     |                                                                                                                                                                                   | Không biết                                                | 5     |               |
| E9  | Anh/ chị có muốn <b>giới thiệu</b> dịch vụ xét nghiệm mà hôm nay anh/chị vừa được làm với người khác không (ví dụ như: vợ/chồng/bạn tình, bạn bè hoặc người thân trong gia đình)? | Có                                                        | 1     |               |
|     |                                                                                                                                                                                   | Không                                                     | 0     |               |
|     |                                                                                                                                                                                   | Không biết/không trả lời                                  | 99    |               |
| E10 | Anh/chị có sẵn sàng trả tiền cho 1 lần làm xét nghiệm HIV như hôm nay với giá 60.000 đồng?                                                                                        | Có                                                        | 1     | <b>0→E13</b>  |
|     |                                                                                                                                                                                   | Không                                                     | 0     |               |
| E11 | Anh/chị có sẵn sàng trả tiền cho 1 lần làm xét nghiệm HIV như hôm nay với giá 90.000 đồng?                                                                                        | Có                                                        | 1     | <b>0→E14</b>  |
|     |                                                                                                                                                                                   | Không                                                     | 0     |               |
| E12 | Anh/chị có sẵn sàng trả tiền cho 1 lần làm xét nghiệm HIV như hôm nay với giá 120.000 đồng?                                                                                       | Có                                                        | 1     | <b>1→E14</b>  |
|     |                                                                                                                                                                                   | Không                                                     | 0     | <b>0 →E14</b> |
| E13 | Anh/chị có sẵn sàng trả tiền cho 1 lần làm xét nghiệm HIV như hôm nay với giá 30.000 đồng?                                                                                        | Có                                                        | 1     |               |
|     |                                                                                                                                                                                   | Không                                                     | 0     |               |
| E14 | Mức giá tối đa anh/chị sẵn sàng chi trả cho 1 lần làm xét nghiệm HIV như hôm nay là bao nhiêu?                                                                                    | Ghi nguyên giá tiền                                       | ----- |               |
| E15 | Trong thời gian tới, anh/ chị dự định bao lâu đi xét nghiệm HIV một lần?<br><br><i>Cho xem hoặc đọc đáp án</i>                                                                    | Vài năm làm 1 lần                                         | 1     |               |
|     |                                                                                                                                                                                   | 1 lần 1 năm                                               | 2     |               |
|     |                                                                                                                                                                                   | 2 lần 1 năm                                               | 3     |               |
|     |                                                                                                                                                                                   | 3 lần 1 năm                                               | 4     |               |
|     |                                                                                                                                                                                   | 4 lần 1 năm hoặc nhiều hơn                                | 5     |               |
|     |                                                                                                                                                                                   | Sẽ không xét nghiệm HIV nữa/<br>Không biết/ Không trả lời | 99    |               |

**XIN CẢM ƠN!**
